# Supplementary material for: An investigation into the hammer toe effects on the lower extremity mechanics and plantar fascia tension: A case for a vicious cycle and progressive damage.
Source: Research Square preprint supplement (doi:10.21203/rs.3.rs-1758484/v1), 2022-06-17
Supplement: Supplementary file 1 [file 62967e2d0654258f1696f91a.docx]

**Appendix A**

**Figure A1. Comparing the intensity of muscle activation between EMG data and OpenSim results.**

**Appendix B**

(a)

(b)

(c)

**Figure B1. Joint Reactions for hammer toe (left hammer toe and healthy contralateral right foot) and healthy foot participants during the stance phase. (a) Hammer toe knee forces (b) Healthy knee forces (c) Hammer toe hip forces**

(a)

(b)

(c)

**Figure B2. Joint Reactions for hammer toe (left hammer toe and healthy contralateral right foot) and healthy foot participants during the stance phase. (a) Healthy hip force (b) Hammer toe ankle force (c) Healthy ankle forces**

(a)

(b)

**Figure B3. Joint Reactions for hammer toe (left hammer toe and healthy contralateral right foot) and healthy foot participants during the stance phase. (a) Hammer toe subtalar forces (b) Healthy subtalar force**

(a)

(b)

**Figure B4. Joint Reactions for hammer toe (left hammer toe and healthy contralateral right foot) and healthy foot participants during the stance phase. (a) Hammer toe ankle moments (b) Healthy ankle moments**

(a)

(b)

(c)

**Figure B5. Joint Reactions for hammer toe (left hammer toe and healthy contralateral right foot) and healthy foot participants during the stance phase. (a) Hammer toe knee moments (b) Healthy knee moments (c) Hammer toe hip moments**

(a)

(b)

(c)

**Figure B6 . Joint Reactions for hammer toe (left hammer toe and healthy contralateral right foot) and healthy foot participants during the stance phase. (a) Healthy hip moments (b) Hammer toe MTP moments (c) Healthy MTP moments**

(a)

(b)

**Figure B7 . Joint Reactions for hammer toe (left hammer toe and healthy contralateral right foot) and healthy foot participants during the stance phase. (a) Hammer toe subtalar moments (b) Healthy subtalar moments**

**Appendix C**

**increase in the risk of ulceration**

**Figure C1.** **The cycle of factors contributes to an increased risk of ulceration in the hammer toe foot.**
